# Supplementary material
Source: Springer Nature journal article supplement (https://www.springermedizin.de/resource/supplementary/12985_2009_783_MOESM5_ESM.pdf/9609188)

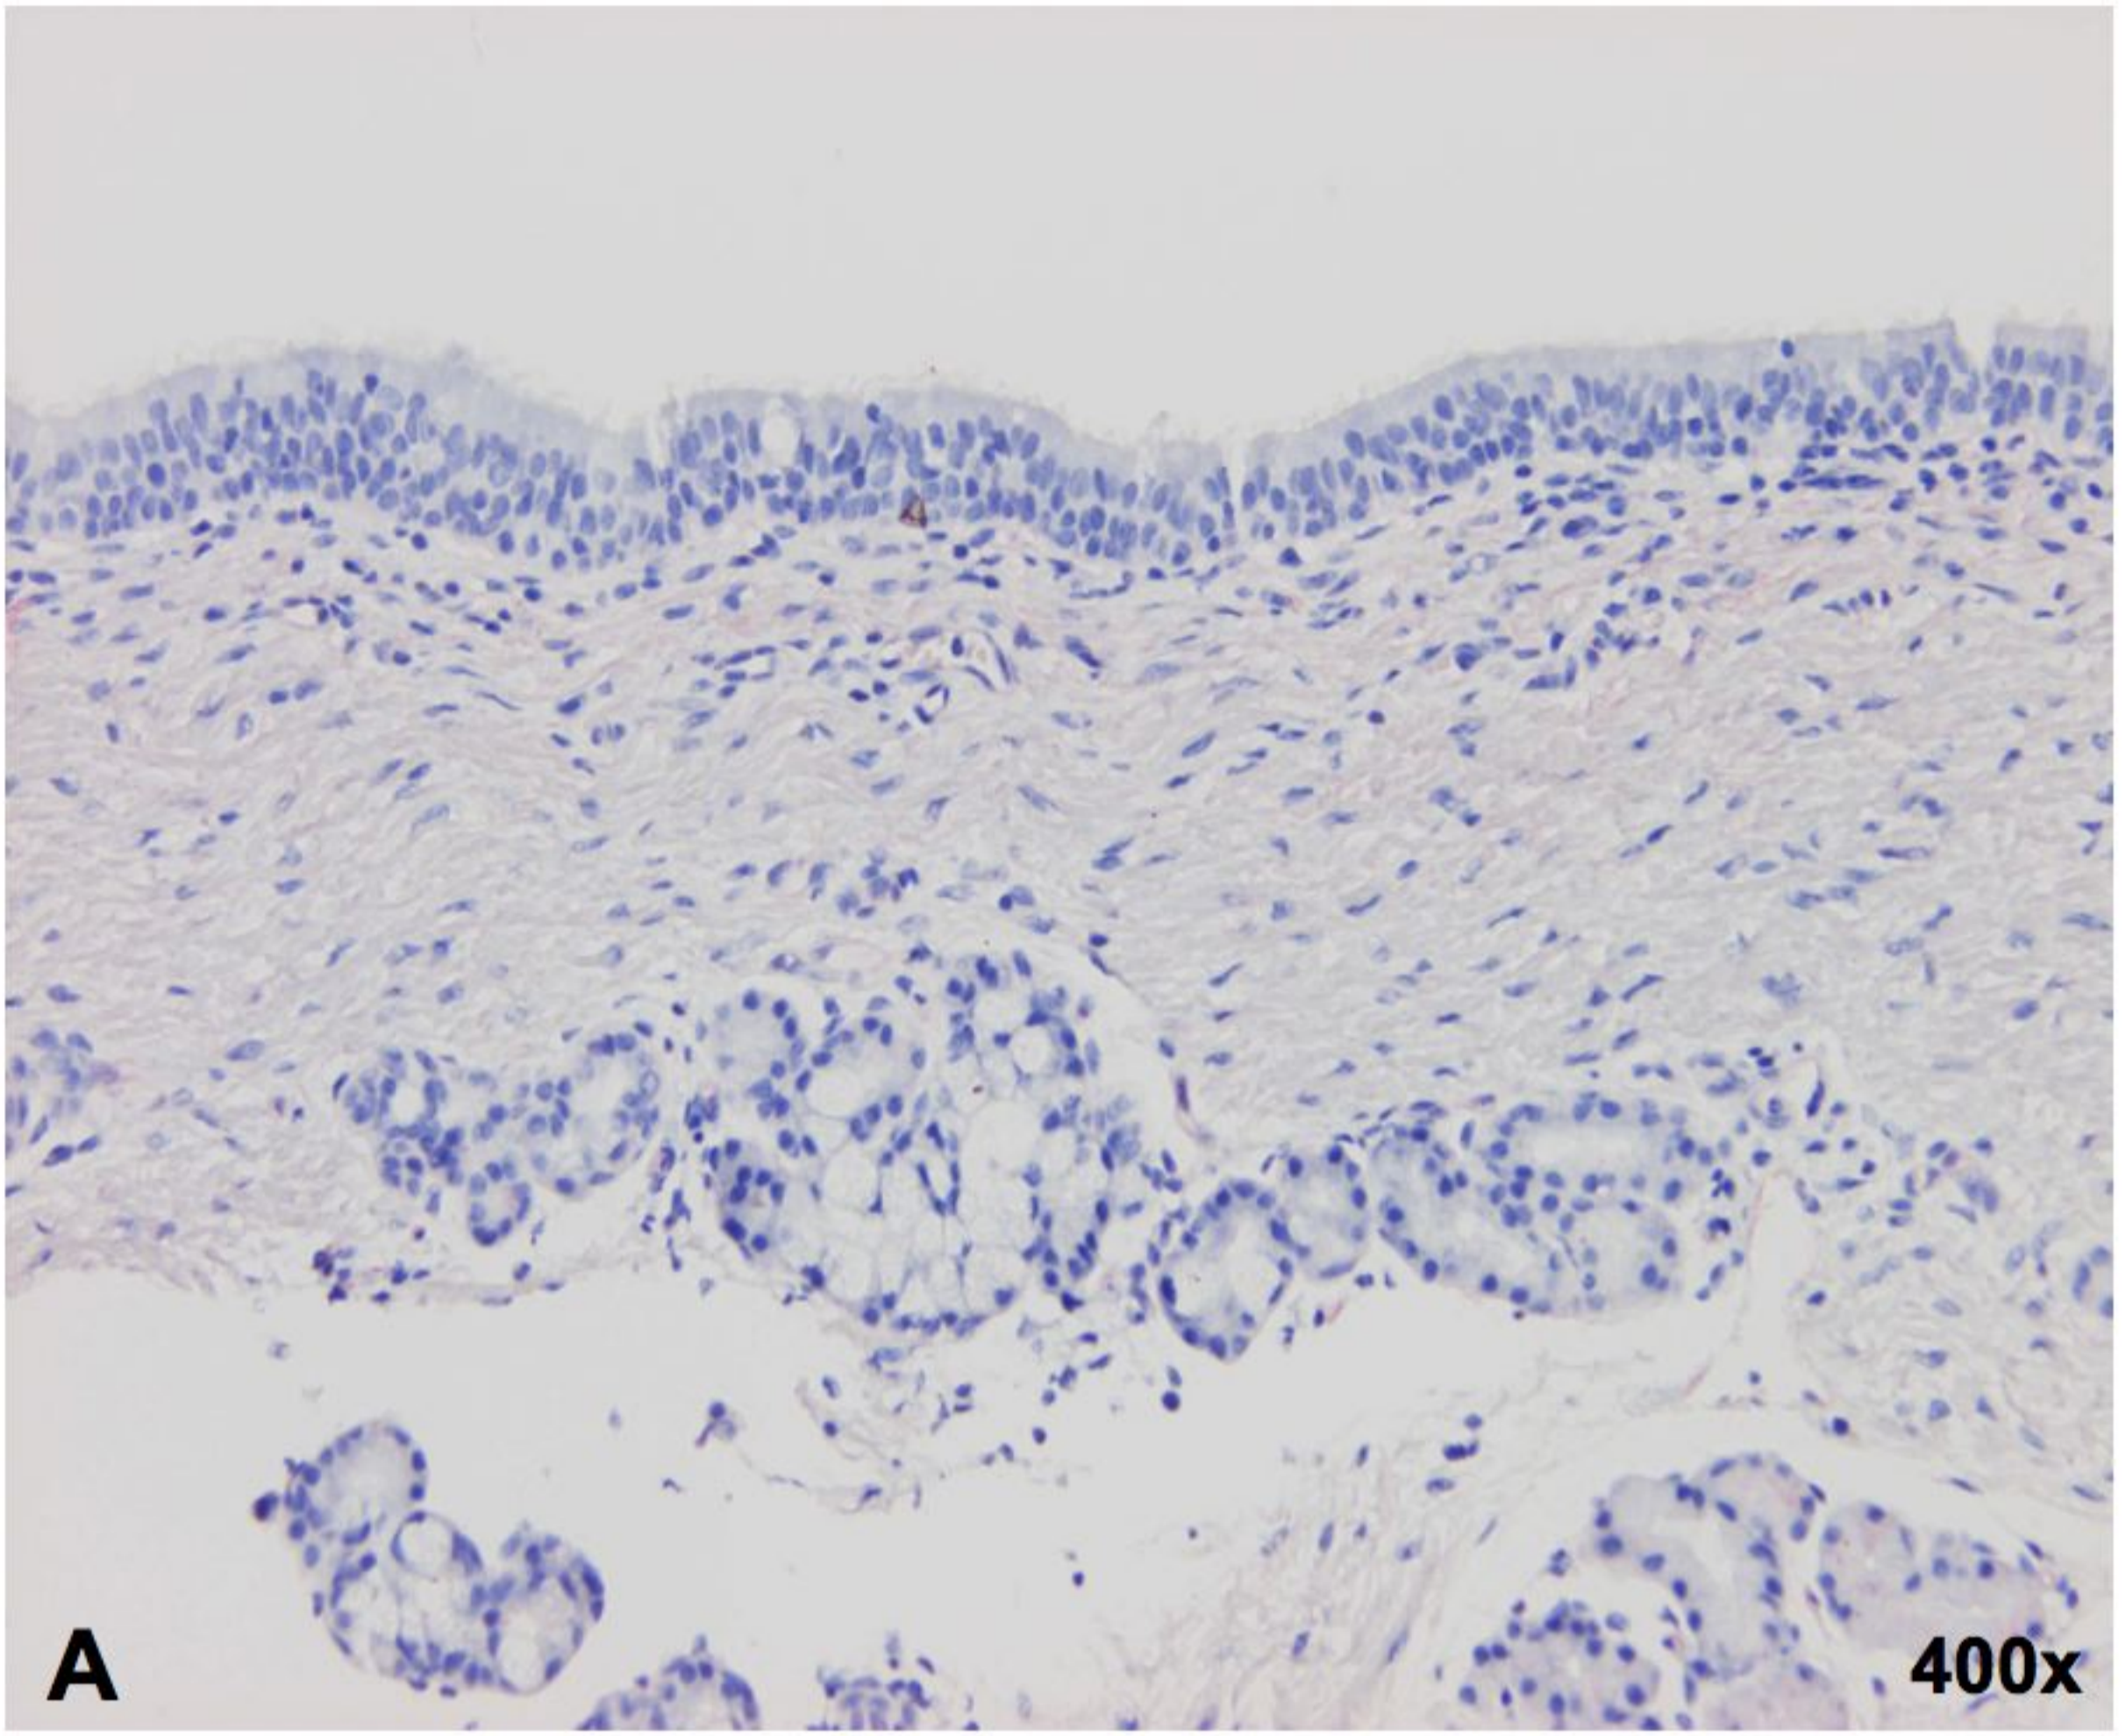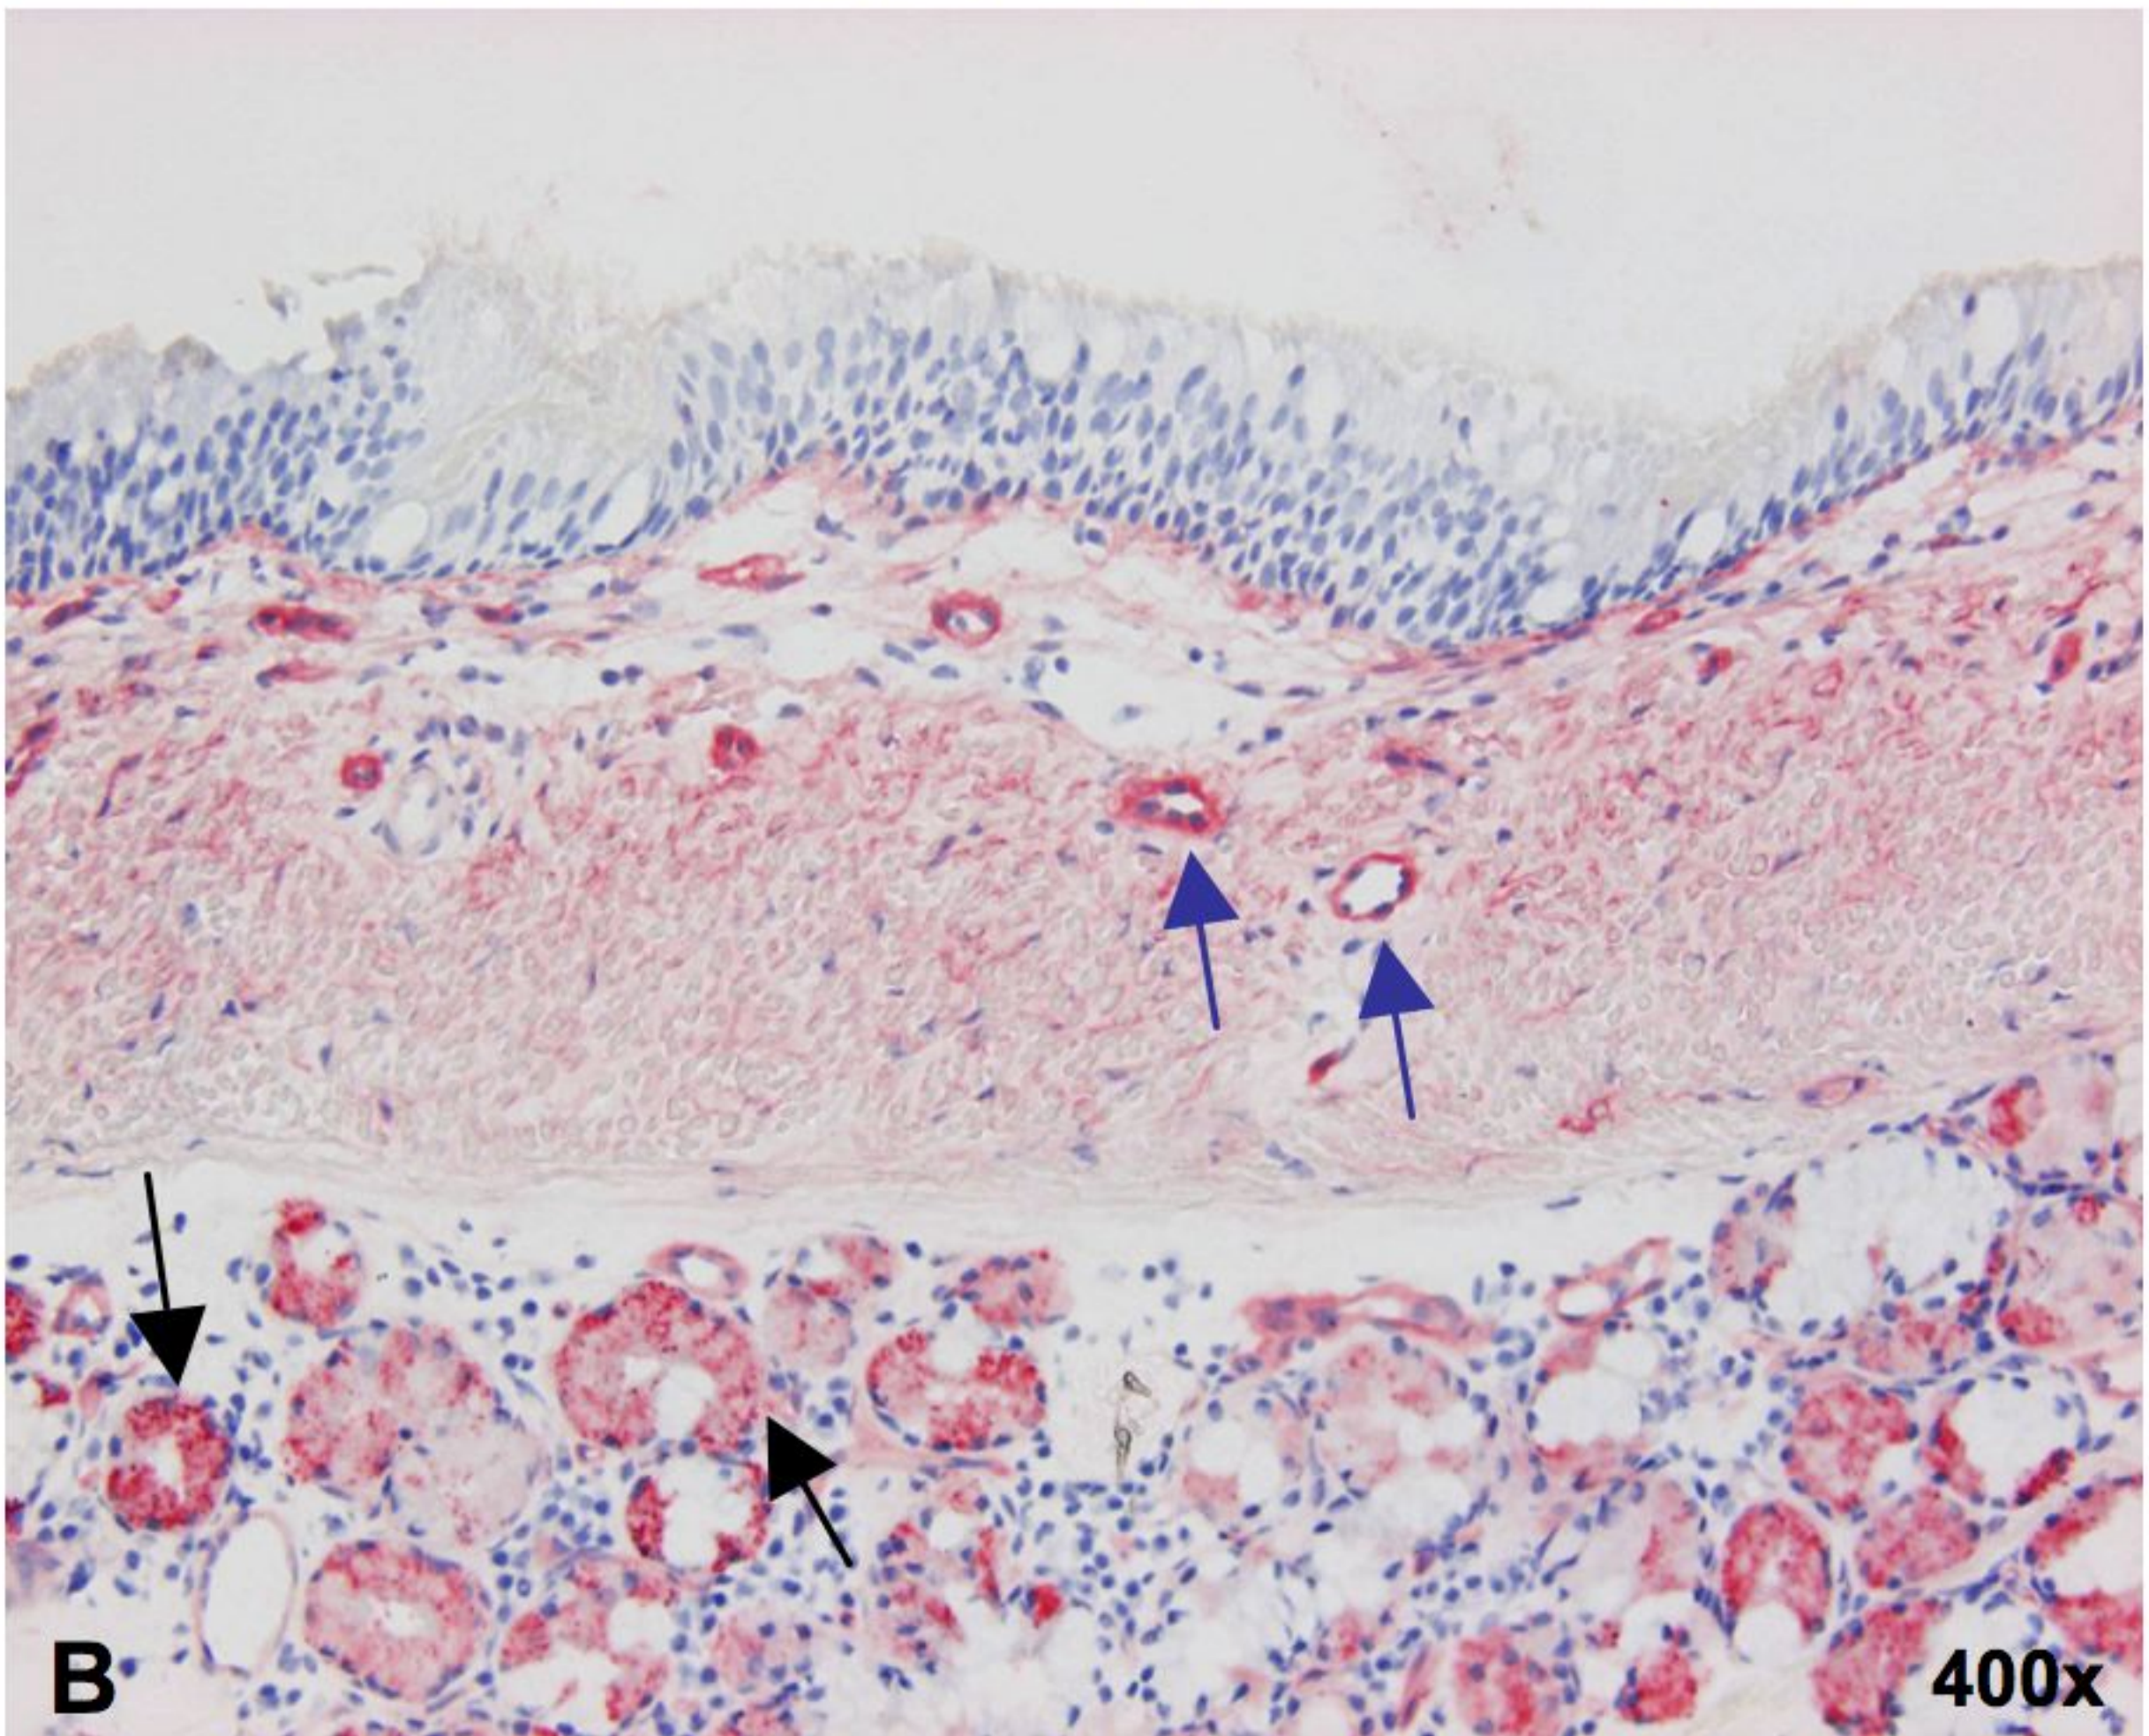

Supplement: MOESM5 [file 9609188]
